# Supplementary material for: Carotenoids Composition of Green Algae Caulerpa racemosa and Their Antidiabetic, Anti-Obesity, Antioxidant, and Anti-Inflammatory Properties
Source: MDPI journal article supplement (doi:10.3390/molecules28073267), 2023-04-06

**Table S1.** Molecular structure visualization of observed carotenoids in *Caulerpa racemosa*

| Compounds              | 2D                                                                                  | 3D                                                                                   |
|------------------------|-------------------------------------------------------------------------------------|--------------------------------------------------------------------------------------|
| $\beta$ -Carotene      | 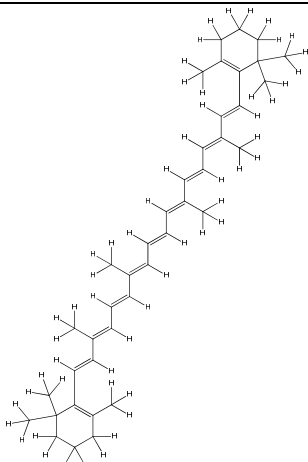   |    |
| $\beta$ -Cryptoxanthin |   |   |
| Fucoxanthin            |  |  |
| Astaxanthin            |  |  |

Canthaxanthin

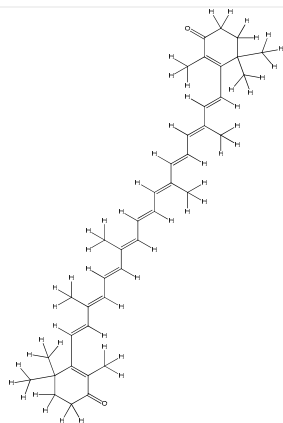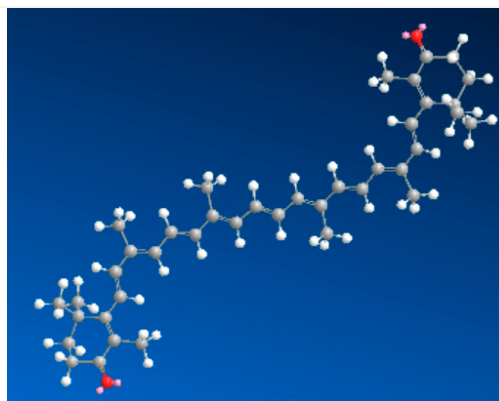

Zeaxanthin

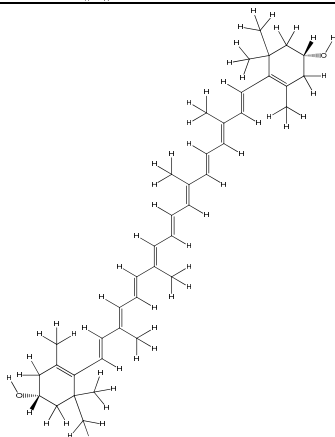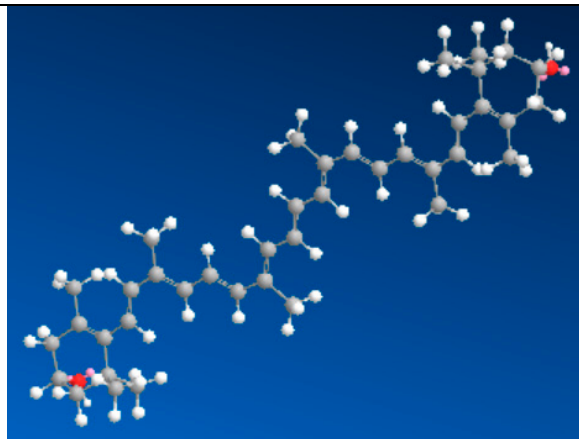

Lutein

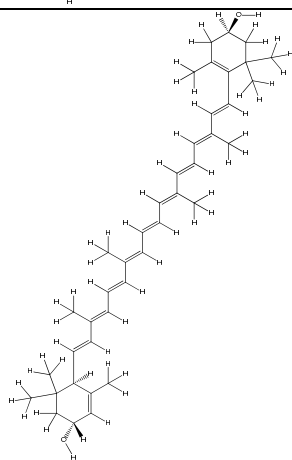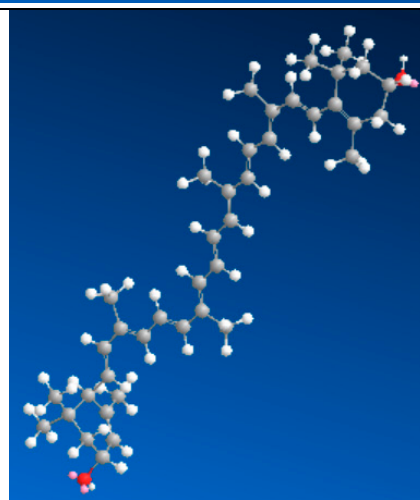

Supplement: s1 [file s1]
